## Novel modification by L/F-tRNA-protein transferase (LFTR) generates a Leu/N-degron ligand in *Escherichia coli*.

1

2 **Ralf D. Ottofuelling<sup>1, †</sup>, Robert L. Ninnis<sup>1, §</sup>, Kaye N. Truscott<sup>1,2\*</sup> & David A. Dougan<sup>1,2\*</sup>**

3 <sup>1</sup>Department of Biochemistry and Genetics, La Trobe Institute for Molecular Science, La Trobe  
4 University, Melbourne, Victoria, 3086, Australia.

5 <sup>2</sup>These authors have contributed equally to this work and share senior authorship

6 **\* Correspondence:**

7 David A. Dougan

8 [d.dougan@latrobe.edu.au](mailto:d.dougan@latrobe.edu.au)

9 Kaye N. Truscott

10 [k.truscott@latrobe.edu.au](mailto:k.truscott@latrobe.edu.au)

11 <sup>†</sup>Present address: CSL, Melbourne, Vic., 3052, Australia.

12 <sup>§</sup>Present address: Trajan, Melbourne, Vic., 3134, Australia.

13

14

15 **Keywords: Leu/N-degron, N-degron, protein modification, ClpS, adaptor, AAA+ protease,**  
16 **bacterial proteostasis. (Min.5-Max. 8)**

17

18 **ABSTRACT**

19 The N-degron pathways are a set of proteolytic systems that relate the half-life of a protein to its N-  
20 terminal (Nt) residue. In *Escherchia coli* the principal N-degron pathway is known as the Leu/N-  
21 degron pathway of which an Nt Leu is a key feature of the degron. Although the physiological role of  
22 the Leu/N-degron pathway is currently unclear, many of the components of the pathway are well  
23 defined. Proteins degraded by this pathway contain an Nt degradation signal (N-degron) composed of  
24 an Nt primary destabilizing (N<sub>d1</sub>) residue (Leu, Phe, Trp or Tyr) and an unstructured region which  
25 generally contains a hydrophobic element. Most N-degrons are generated from a pro-N-degron,  
26 either by endoproteolytic cleavage, or by enzymatic attachment of a N<sub>d1</sub> residue (Leu or Phe) to the  
27 N-terminus of a protein (or protein fragment) by the enzyme Leu/Phe tRNA protein transferase  
28 (LFTR) in a non-ribosomal manner. Regardless of the mode of generation, all Leu/N-degrons are  
29 recognized by ClpS and delivered to the ClpAP protease for degradation. To date, only two  
30 physiological Leu/N-degron bearing substrates have been verified, one of which (PATase) is  
31 modified by LFTR. In this study, we have examined the substrate proteome of LFTR during  
32 stationary phase. From this analysis, we have identified several additional physiological Leu/N-  
33 degron ligands, including AldB, which is modified by a previously undescribed activity of LFTR.  
34 Importantly, the novel specificity of LFTR was confirmed *in vitro*, using a range of model proteins.  
35 Our data shows that processing of the Nt-Met of AldB generates a novel substrate for LFTR.  
36 Importantly, the LFTR-dependent modification of T<sub>2</sub>-AldB is essential for its turnover by ClpAPS, *in*  
37 *vitro*. To further examine the acceptor specificity of LFTR, we performed a systematic analysis using  
38 a series of peptide arrays. These data reveal that the identity of the second residue modulates  
39 substrate conjugation with positively charged residues being favored and negatively charged and  
40 aromatic residues being disfavored. Collectively, these findings extend our understanding of LFTR  
41 specificity and the Leu/N-degron pathway in *E. coli*.

42

## 43 INTRODUCTION

44 Protein degradation is an essential cellular process that is responsible for the removal of unwanted or  
45 damaged proteins. Given the irreversible nature this process, the recognition of a protein substrate is  
46 generally tightly controlled, not only by the conditional exposure of a degnon, but also by the  
47 regulated activation of distinct proteolytic machines that are responsible for recognition (and  
48 removal) of these proteins. In the bacterial cytosol, this process is performed by a handful of ATP-  
49 dependent machines, which are commonly referred to as AAA+ (ATPase associated with a variety of  
50 cellular activities) proteases (Striebel et al., 2009;Sauer and Baker, 2011;Gur et al., 2013;Alhuwaider  
51 and Dougan, 2017). These machines are generally composed of two components: an ATP-dependent  
52 unfoldase component belonging to the AAA+ superfamily (Neuwald et al., 1999;Ogura and  
53 Wilkinson, 2001), which is responsible for recognition and unfolding of the substrate and a  
54 specialized peptidase component responsible for destruction of the unfolded protein into short  
55 peptides. In a handful of cases, these machines also employ an additional component, commonly  
56 known as adaptor proteins, for the recognition of specific degrons (Dougan et al., 2002a;Kirstein et  
57 al., 2009;Mahmoud and Chien, 2018).

58 Degrons are generally short linear motifs (1 – 12 residues long) that serve as degradation signals.  
59 Given the main determinant of these signals is located at either the N- or C-terminus of a protein,  
60 they are commonly termed N- or C-degrons, respectively (Tobias et al., 1991;Tu et al., 1995;Keiler et  
61 al., 1996;Flynn et al., 2003;Erbse et al., 2006;Ninnis et al., 2009;Gao et al., 2019;Varshavsky,  
62 2019;Timms and Koren, 2020). Although some degrons are constantly exposed and hence  
63 constitutively degraded, most degrons are generated conditionally, through the activation or exposure  
64 of a pro-degron (Hwang et al., 2010;Kim et al., 2014;Chen et al., 2017;Lucas and Ciulli,  
65 2017;Dougan and Varshavsky, 2018;Varshavsky, 2019). The molecular components responsible for  
66 the generation, recognition and removal of a degnon are defined by a degnon pathway (Varshavsky,  
67 2019;Timms and Koren, 2020). Currently, two N-degron pathways have been described in bacteria;  
68 the fMet/N-degron pathway for the co-translational removal of misfolded nascent polypeptides that  
69 retain their formyl group (Piatkov et al., 2015) and the Leu/N-degron pathway (Varshavsky, 2019),  
70 formerly the N-end rule pathway (Tobias et al., 1991), which is the canonical N-degron pathway in  
71 bacteria. Although the physiological role of the Leu/N-degron pathway in *E. coli* remains poorly  
72 understood, many of the molecular components are well defined. In the bacterial Leu/N-degron  
73 pathway, individual residues located at the N-terminus of a protein, can be considered either

## N-terminal Thr is a novel secondary destabilizing residue

74 stabilizing or destabilizing (Tobias et al., 1991;Varshavsky, 2011). Similar to the Eukaryotic N-  
75 degtron pathways, Nt destabilizing ( $N_d$ ) of the bacterial Leu/N-degtron pathway are hierarchic (Mogk  
76 et al., 2007;Varshavsky, 2011;Dougan et al., 2012;Tasaki et al., 2012;Gibbs et al., 2014;Dissmeyer et  
77 al., 2018;Bouchnak and van Wijk, 2019;Varshavsky, 2019), composed of primary destabilizing ( $N_{d1}$ )  
78 residues (Leu, Phe, Tyr and Trp) and secondary destabilizing ( $N_{d2}$ ) residues. While  $N_{d1}$  residues are  
79 recognized directly by ClpS, the N-recognin (N-terminal recognition component) of the pathway  
80 (Erbse et al., 2006;Wang et al., 2008b;Schuenemann et al., 2009),  $N_{d2}$  residues require specific  
81 modification to generate a destabilizing activity (i.e. attachment of a  $N_{d1}$  residue, e.g. Leu or Phe). To  
82 date, a total of five different  $N_{d2}$  residues have been identified in bacteria, three (Arg, Lys and in a  
83 single case, Met) in *E. coli* (Tobias et al., 1991;Shrader et al., 1993;Ninnis et al., 2009;Dougan et al.,  
84 2012) and four (Arg, Lys, Asp and Glu) in *Vibrio vulnificus* (Graciet et al., 2006). The modification  
85 of proteins bearing an  $N_{d2}$  residue is performed by two separate enzymes, the bacterial protein  
86 transferase (Bpt) is responsible for the Nt-leucylation of proteins bearing the  $N_{d2}$  residues (Asp or  
87 Glu) in *Vibrio vulnificus* (Graciet et al., 2006). While in *E. coli*, Leu/Phe-tRNA-protein transferase  
88 (L/F-transferase, here referred to as LFTR) is responsible for the conjugation of Leu or Phe to  
89 proteins bearing the  $N_{d2}$  residue (Arg, Lys or Met) (Tobias et al., 1991;Shrader et al., 1993;Ninnis et  
90 al., 2009;Schmidt et al., 2009). Based on the crystal structure, LFTR contains two pockets, one for  
91 the recognition of the acceptor (or substrate) and the other for recognition of the donor tRNA bearing  
92 the amino acid for conjugation to the substrate (Suto et al., 2006;Watanabe et al., 2007). While the  
93 donor specificity of LFTR *in vitro* includes Leu-tRNA, Phe-tRNA and to a lesser extent Met-tRNA  
94 (Kaji et al., 1963;Leibowitz and Soffer, 1970;Scarpulla et al., 1976), *in vivo* studies suggest that  
95 leucylation is the dominant type of conjugation (Shrader et al., 1993). Similarly, although the  
96 acceptor specificity of LFTR, originally defined using model substrates, was proposed to be  
97 restricted to the Nt amino acids Arg, Lys and to a lesser extent His (Soffer, 1973;Tobias et al., 1991),  
98 the identification of Putrescine aminotransferase (PATase, also known as PatA) as the first  
99 physiological substrate of LFTR showed that Met can also serve as an acceptor for this enzyme  
100 (Ninnis et al., 2009;Schmidt et al., 2009). This finding led to speculation that the acceptor specificity  
101 of LFTR may be broader than initially defined using model substrates (Tobias et al., 1991;Ninnis et  
102 al., 2009;Dougan et al., 2010). Therefore, in order to further investigate the acceptor specificity of  
103 LFTR we sought to identify the physiological substrates of this enzyme.

104 Here, we report the affinity isolation of ClpS-interacting proteins from an *E. coli* strain that lacks  
105 LFTR activity ( $\Delta aat$ ). Comparison of the ClpS-interacting proteins from this strain, with those

## N-terminal Thr is a novel secondary destabilizing residue

106 isolated from  $\Delta clpA$  *E. coli*, facilitated the identification of eight putative LFTR Leu/N-degron  
107 ligands. Three proteins (AldB, AccD and SufD) were verified, using specific antisera, as LFTR-  
108 dependent ClpS interacting proteins. The ClpAP-mediated *ex vivo* turnover of these proteins, was not  
109 only dependent on the presence of ClpS but also the activity of LFTR. Significantly, the presence of  
110 a non-ribosomal primary destabilizing residue (Leu) was confirmed by N-terminal sequencing of two  
111 ligands (AldB and AccD), and the ClpS-dependent turnover of these proteins was also verified using  
112 purified components. Unexpectedly, a primary destabilizing residue (Leu) was attached to an Nt Thr  
113 on AldB, which identifies MetAP is an integral component of the Leu/N-degron pathway.  
114 Furthermore, based on the identification of LT<sub>2</sub>AldB as a novel N-degron ligand, we systematically  
115 re-examined the *in vitro* specificity of LFTR using peptide-based arrays. Taken together, our data  
116 show that the recognition of N<sub>d2</sub> residues by LFTR is broader than previously proposed and the  
117 specificity of LFTR is clearly influenced by residues immediately downstream of the N<sub>d2</sub> residue of  
118 the acceptor protein. Finally, based on our identification of this novel ligand, we speculate that  
119 MetAP cleavage of other proteins bearing the Nt sequence, MTN may also be compatible with the  
120 generation of additional N-degron ligands (under different conditions). From this bioinformatic  
121 analysis, we identified 12 cytosolic proteins in *E. coli* with the Nt sequence MTN, six of which are  
122 (at least partially) cleaved by MetAP and one (BarA) is a putative ClpA-interacting protein (Butland  
123 et al., 2005; Rajagopala et al., 2014; Bienvenut et al., 2015) and hence may represent an additional  
124 Leu/N-degron substrate in *E. coli*.

## 125 MATERIALS AND METHODS

### 126 Strains, proteins, protein analysis and antibodies

127 *E. coli* knockout strains  $\Delta clpA$  (JW0866) and  $\Delta aat$  (JW0868), were grown at 37 °C for 26 h in LB  
128 media supplemented with 50 mg/ml kanamycin, as described in Ninnis et al., (2009). ClpA, ClpP and  
129 ClpS (wild-type and mutant) were expressed in *E. coli* and purified as described previously (Dogan  
130 et al., 2002b). LFTR was expressed and purified as described in Ninnis et al., (2009). Leu/N-degron  
131 substrates (and controls): SufD, K<sub>24</sub>SufD, LK<sub>24</sub>SufD, AccD, K<sub>16</sub>AccD, LK<sub>16</sub>AccD, MT<sub>2</sub>AldB,  
132 T<sub>2</sub>AldB and LT<sub>2</sub>AldB, model GFP-fusion proteins: (LK<sub>16</sub>AccD<sub>16-20</sub>GFP, LK<sub>16</sub>AccD<sub>16-24</sub>GFP,  
133 LK<sub>16</sub>AccD<sub>16-38</sub>GFP, LK<sub>16</sub>AccD<sub>16-55</sub>GFP, MT<sub>2</sub>AldB<sub>3-11</sub>GFP, T<sub>2</sub>AldB<sub>3-11</sub>GFP and LT<sub>2</sub>AldB<sub>3-11</sub>GFP)  
134 and model LFTR substrates (and controls): R-PATase, T-PATase, FL-PATase and FM-PATase were  
135 all generated using the Ub-fusion system (Catanzariti et al., 2004) and purified essentially as  
136 described in Ninnis et al., (2009). Coomassie-stained Leu/N-degron substrates were excised from

## N-terminal Thr is a novel secondary destabilizing residue

137 2D-SDS-PAGE gels and in-gel proteolytic digestion performed with either trypsin or GluC. Proteins  
138 were identified by MS/MS analysis as described in Ninnis et al., (2009). The N-terminal sequence of  
139 selected Leu/N-degron ligands was determined from a protein spot excised from a PVDF membrane,  
140 subjected to 5 – 7 cycles of automated Edman degradation, using an Applied Biosystems 494 Procise  
141 Protein sequencing system.

### 142 **In vitro transcription**

143 The tRNA genes (*pheV* and *leuZ*) were amplified with specific primers that included a T7 promoter.  
144 Transcription of tRNA<sup>pheV</sup> and tRNA<sup>leuZ</sup> was performed with 20 U T7 RNA Polymerase (37 °C for  
145 90 min) using the Riboprobe® *in vitro* Transcription System (Promega) essentially as described in  
146 the instructions manual. Following transcription, the sample (10 µl) was analyzed by gel  
147 electrophoresis using a 2 % (w/v) TAE-agarose gel to estimate the tRNA concentration.

### 148 **In vitro aminoacyl-transferase assay**

149 Aminoacylation experiments were performed essentially as described (Ninnis et al., 2009), with  
150 minor modifications. For aminoacylation, the protein of interest (5 - 125 pmol) was incubated (37 °C  
151 for 8 min) in 25 µl reaction buffer (50 mM Tris-HCl pH 8.0, 100 mM KCl, 10 mM Mg(OAc)<sub>2</sub>, 1 mM  
152 DTT, 2 mM ATP) containing ~1.0 µM of either tRNA<sup>pheV</sup> or tRNA<sup>leuZ</sup>, 8.75 µM [<sup>14</sup>C]-Phe/Leu (18.3  
153 GBq/mmol (PerkinElmer), 38.5 U *E. coli* aminoacyl-tRNA synthetase (Sigma) and 0.18 µM  
154 Leucyl/Phenylalanyl-tRNA-protein transferase (LFTR). The reaction was stopped by the addition of  
155 sample buffer, then separated by 12.5 % Tris-glycine SDS-PAGE. Following separation, proteins  
156 were fixed (30 % (v/v) Methanol, 10 % (v/v) Acetic acid) in the gel for 30 min, then washed for 15  
157 min in (30 % (v/v) Methanol, 2 % (v/v) Glycerol). After drying the gel (80 °C for 1.5 h) using a  
158 Model 583 Gel DRYER (Bio-Rad), it was exposed to a Phosphor Screen (GE Healthcare) for  
159 between 1 - 4 days and the protein signal visualized using a Typhoon Trio Variable Mode Imager  
160 (GE Healthcare).

161

162 To examine the binding specificity of LFTR, aminoacylation of peptides attached to a cellulose  
163 membrane was performed. Peptides, attached to a cellulose membrane through their C-terminus,  
164 were synthesized by spot synthesis (JPT Peptide Technologies). The N-terminal peptide sequences  
165 were derived from PATase, α-casein, β-galactosidase and AldB (see Supplementary Tables 3, 4 and  
166 5 for peptide sequences of individual spots). The membrane was washed (three times with 1x PBS)  
167 prior to incubation with the reaction components (15 min at 37 °C, in a glass tube with gentle

## N-terminal Thr is a novel secondary destabilizing residue

168 rolling). Prior to exposure of the membrane, the membrane was washed four times with 500  $\mu$ l of 1x  
169 PBS. After air-drying the membrane was exposed to a Phosphor Screen (GE Healthcare) and the  
170 signal visualized using a Typhoon Trio Variable Mode Imager (GE Healthcare).

171

### 172 **In vitro degradation assay**

173 Unless otherwise stated, *in vitro* degradation assays were routinely performed in 200  $\mu$ l, using ClpAP  
174 Buffer (50 mM Tris-HCl pH 7.5, 300 mM NaCl, 20 mM MgAc, 10 % (v/v) Glycerol, 1 mM DTT)  
175 containing ClpA<sub>6</sub>P<sub>14</sub> (200 nM) in the absence or presence of ClpS (1.2  $\mu$ M). All reactions were pre-  
176 incubated (for 1 min at RT) with ATP (5 mM) to allow ClpAP complex formation, prior to the  
177 addition of the substrate. The reaction (performed at 37 °C) was initiated upon substrate addition (0.5  
178 - 1  $\mu$ M). To monitor the turnover of non-fluorescent protein substrates, samples were collected at  
179 various time-points (as indicated) and immediately mixed with SDS-PAGE loading buffer. Proteins  
180 were then separated by SDS-PAGE and visualized, either by staining with Coomassie Brilliant Blue  
181 or by immunodecoration with specific antisera following transfer to a PVDF membrane. An ATP-  
182 regeneration system (4 mM Phosphoenolpyruvate (Sigma) and 20  $\mu$ g/ml pyruvate kinase (Sigma))  
183 was included in reactions lasting longer than 60 min. To monitor the turnover of fluorescent  
184 substrates (e.g. GFP-tagged protein substrates) GFP fluorescence (excitation wavelength = 400 nm  
185 and emission wavelength = 510 nm) was monitored for the indicated times using a Spectramax M5e  
186 plate reader (Molecular Device Inc.), essentially as described (Dougan et al., 2002b).

### 187 **Purification of ClpS interacting proteins**

188 To study N-degron binding, *in vitro* “pull-down” experiments were performed as described  
189 previously (Geissler et al., 2002; Ninnis et al., 2009). Briefly, settled NiNTA-agarose beads  
190 (QIAGEN) were equilibrated in Buffer A (50 mM Tris-HCl pH 8.0, 300 mM NaCl, 5 mM  
191 Imidazole). The bait protein (wild type or mutant His<sub>6</sub>-ClpS or His<sub>10</sub>-ClpS) was immobilized to the  
192 equilibrated beads (15 min end-over-end mixing at 4 °C) at a ratio of 2  $\mu$ g of bait protein per 1  $\mu$ l of  
193 settled beads. The beads were then washed (3 x 10 min) with 3 bed volumes (BV) of Buffer B (50  
194 mM Tris-HCl pH 8.0, 300 mM NaCl, 20 mM Imidazole) followed by a single wash (10 min at 4 °C)  
195 with end-over-end mixing using 3 BV of Buffer C (20 mM HEPES-KOH pH 7.5, 100 mM KOAc, 10  
196 mM Mg(OAc)<sub>2</sub>, 10 % (v/v) Glycerol, 10 mM Imidazole, 0.5 % (v/v) Triton X-100). For N-degron  
197 binding studies using purified substrate proteins, NiNTA-agarose beads containing immobilized

## N-terminal Thr is a novel secondary destabilizing residue

198 His<sub>6</sub>- or His<sub>10</sub>-ClpS were incubated (30 min at 4 °C, with end-over-end mixing) with an equimolar  
199 amount of the prey protein. To isolate novel ClpS-interacting proteins, ~1 g of soluble *E. coli* cell  
200 lysate (in Buffer C supplemented with a cocktail of protease inhibitors (cOmplete, EDTA-free  
201 (Roche)), was incubated (30 min at 4 °C) with immobilized ClpS (~1 mg) with end-over-end mixing.  
202 Unbound proteins were removed by centrifugation (300 g for 5 min at 4 °C) and the slurry containing  
203 bound proteins transferred to a 1 ml MoBiTec column (Molecular Biotechnology). The slurry was  
204 washed with 40 BV of Buffer D (Buffer C containing 0.25 % (v/v) Triton X-100), residual buffer  
205 was removed by centrifugation (300 g for 1 min at 4 °C). Finally, ClpS-interacting proteins were  
206 eluted by centrifugation (300 g for 1 min at 4 °C) with 1 BV of FR-dipeptide (1 mg/ml) in Buffer C  
207 (without Triton X-100). Eluted proteins were analyzed by SDS-PAGE, immunoblotting or 2D-  
208 PAGE.

### 209 2D-PAGE

210 ClpS-interacting proteins (max. 250 µg), recovered by FR dipeptide elution, from an *E. coli* cell  
211 lysate were precipitated with 4 volumes of cold acetone and resuspended in 150 µl rehydration  
212 solution (8 M Urea, 2 % (w/v) CHAPS, 0.5 % (v/v) IPG buffer 4 - 7 or 3 - 10 (Pharmacia), 20 mM  
213 DTT, 0.002 % (w/v) Bromophenol blue). Rehydrated protein samples were separated according to  
214 their isoelectric point on an Immobiline® DryStrip gel (13 cm, linear pH 4-7 or 3-10 gradient strip  
215 (Pharmacia)) using an Ettan IPGphor II Manifold with cup loading. The samples were loaded  
216 towards the anode end of the rehydrated DryStrip gel (in rehydration solution for 10-20 h) and the  
217 proteins focused using the following conditions: 100 V for 0.5 h, from 100 V to 500 V over 2 h, from  
218 500 V to 1,000 V over 1 h, from 1,000 to 8,000 V over 3.5 h and 8,000 V for 1 h at 20 °C. The  
219 DryStrip gel was then equilibrated with gentle rocking, first in Buffer A (50 mM Tris-HCl pH 8.8, 6  
220 M Urea, 30 % (v/v) Glycerol, 1 % (w/v) DTT and 2 % (w/v) SDS) then in Buffer B (50 mM Tris-  
221 HCl pH 8.8, 6 M Urea, 30 % (v/v) Glycerol, 135 mM Iodoacetamide and 2 % (w/v) SDS), each for  
222 15 min. The equilibrated DryStrip gel was then placed on top of a 4-16 % Tris-Tricine gel and the  
223 proteins separated, in the second dimension, by SDS-PAGE and visualized by Coomassie Brilliant  
224 Blue staining or immunodecoration after being transferred to PVDF.

225

### 226 RESULTS

#### 227 Deletion of *aat* (encoding LFTR) inhibits docking of specific N-degron ligands to ClpS



## N-terminal Thr is a novel secondary destabilizing residue

228 Although there have been significant advances defining the physiological role of the Leu/N-degron  
229 pathway in Salmonella (Yeom et al., 2017;Gao et al., 2019;Yeom and Groisman, 2019), our current  
230 understanding of this pathway in *E. coli* is largely derived from *in vitro* studies using model  
231 substrates (Tobias et al., 1991;Shrader et al., 1993;Erbse et al., 2006;Wang et al., 2008b;Kress et al.,  
232 2009;Schuenemann et al., 2009;Roman-Hernandez et al., 2011;Varshavsky, 2011;Rivera-Rivera et  
233 al., 2014). As a consequence, the physiological substrates of ClpS are largely unknown and the  
234 biological function of the pathway is currently unclear (Ninnis et al., 2009;Schmidt et al.,  
235 2009;Dougan et al., 2010;Humbard et al., 2013). Previously, we developed an affinity method to  
236 isolate and identify physiological Leu/N-degron substrates from *E. coli* (Ninnis et al., 2009). To help  
237 determine, which of the previously identified ligands may be *bona fide* N-degron substrates of the  
238 ClpAPS machinery, we generated antibodies to a selection of ligands and monitored their ClpS-  
239 dependent turnover by ClpAP *ex vivo* (**Figure 1A** and **B**). From these experiments we identified  
240 SufD (of the SufC/D complex), AccD (of the AccA/D complex) and AldB as putative Leu/N-degron  
241 substrates. To determine which of the above putative Leu/N-degron substrates are modified by LFTR  
242 we isolated Leu/N-degron ligands from  $\Delta clpA$  cells and compared them with the Leu/N-degron  
243 ligands from a mutant *E. coli* strain ( $\Delta aat$ ) which lacks LFTR (**Figure 1C** and Supplementary Figure  
244 1). Initially we analyzed the ClpS-interacting proteins by SDS-PAGE (**Figure 1C**). Consistent with  
245 our previous analysis, ~ 30 different proteins were eluted (using the FR dipeptide) from the wild type  
246 ClpS column (**Figure 1C**, compare lanes 4 and 5). This included two highly abundant proteins (Dps  
247 at ~ 17 kDa and PATase at ~ 50 kDa), previously identified as natural substrates of the *E. coli* Leu/N-  
248 degron pathway (Ninnis et al., 2009;Schmidt et al., 2009). Next, we used 2D-PAGE to compare the  
249 ClpS-interactome isolated from  $\Delta clpA$  and  $\Delta aat$  cells. As a control, we monitored the recovery of  
250 PATase, a confirmed LFTR-dependent substrate (Ninnis et al., 2009;Schmidt et al., 2009;Humbard et  
251 al., 2013). As expected, and consistent with our previous findings, PATase was absent from the  
252 dipeptide eluted fraction derived from  $\Delta aat$  cells (**Figure 1C**, lane 6 and Supplementary Figure 1B,  
253 Spot 3). These data validate the strains used for the isolation of Leu/N-degron substrates and our  
254 approach to identify Leu/N-degron substrates that are modified by LFTR. Notably, more than half of  
255 the prominent protein spots were essentially unchanged in the two elution profiles (Supplementary  
256 Figure 1C, black Spots 9 - 17) suggesting that, under these conditions, the majority of Leu/N-degron  
257 ligands are not modified by LFTR. Nevertheless, using this approach we were able to identify nine  
258 prominent protein spots (recovered from  $\Delta clpA$  cells) that were absent from the dipeptide eluted  
259 fraction derived from  $\Delta aat$  cells (Supplementary Figure 1C, black spots, red numbers 1 – 8),

## N-terminal Thr is a novel secondary destabilizing residue

260 suggesting that several N-degron ligands are modified by LFTR *in vivo*. To determine which proteins  
261 were modified by LFTR and at which residue this modification occurred, we identified the proteins  
262 recovered from  $\Delta clpA$  by Mass Spectrometry and determined the N-terminal sequence of the most  
263 prominent spots (Supplementary Figure 1C, dotted red circles, see Supplementary Table 1). From  
264 these data, we identified eight LFTR-dependent ligands (see Supplementary Table 1), two of which  
265 (AccA and SufC) were excluded as *bona fide* N-degron substrates, based on the absence of an N<sub>d1</sub>  
266 residue (i.e. the Nt residue of AccA, recovered from the pull-down, was Ser2) or by the lack of  
267 ClpAPS-mediated turnover (i.e. although both SufC and SufD were both recovered by pull-down in  
268 an LFTR-dependent manner, only SufD was degraded by ClpAPS, *ex vivo*) (see **Figure 1B** and **C**).  
269 Of the remaining six LFTR-dependent ligands, the N-terminal sequence of three (AccD, AldB and  
270 PATase) was experimentally determined (Supplementary Table 1) while the N-terminus of two other  
271 proteins (SufD and RsgA) was proposed, based either on the apparent MW of the recovered ligand or  
272 published evidence (Supplementary Table 1). Unfortunately, we were unable to identify the putative  
273 N-degron within ClpB.

274 In the case of SufD, although its interaction with ClpS was dependent on LFTR activity and its *ex*  
275 *vivo* turnover was ClpAPS-dependent (**Figure 1B**) we were unable to determine the identity of its N-  
276 terminal residue. Therefore, based on the apparent MW of SufD (recovered from the pull-down) we  
277 identified a potential processing site and speculated that SufD was processed (by an unknown  
278 peptidase) to reveal Lys24 at the N-terminus (i.e. K<sub>24</sub>-SufD), to which an N<sub>d1</sub> residue is attached.  
279 Consistent with this proposal, recombinant LK<sub>24</sub>-SufD co-migrated with processed SufD recovered  
280 from the pulldown (Supplementary Figure 2A) and was rapidly degraded *in vitro* by ClpAPS  
281 (Supplementary Figure 2B, filled circles and Supplementary Figure 2C). Interestingly, although the  
282 post-translational modification of SufD was not essential for its turnover, the type of modification did  
283 control the rate of SufD turnover *in vitro*. For instance, in the absence of endoproteolytic processing,  
284 the ClpAP-mediated turnover of SufD was very slow (Supplementary Figure 2B, open triangles).  
285 However, following removal of the N-terminal segment, the rate of SufD turnover (i.e. K<sub>24</sub>-SufD)  
286 was enhanced, by ~ 2.5-fold. Notably, the turnover of both SufD and K<sub>24</sub>-SufD was completely  
287 inhibited in the presence of ClpS (Supplementary Figure 2B, filled triangles and filled squares), while  
288 in contrast, LK<sub>24</sub>-SufD was rapidly degraded in the presence of ClpS. Indeed, in the presence of ClpS  
289 the ClpAP-mediated turnover of SufD was increased ~ 6-fold by its processing and modification  
290 (Supplementary Figure 2B, compare open triangles and filled circles). Taken together these *in vitro*  
291 data could suggest that processing of SufD, through activation of the Leu/N-degron pathway, is a

## N-terminal Thr is a novel secondary destabilizing residue

292 potential mechanism to fine-tune the rate of SufD turnover in the presence of ClpS and hence control  
293 the cellular levels of SufD. However, the physiological conditions that might trigger SufD processing  
294 and its conversion into a putative N-degron substrate currently remain unknown.

295 Next, we examine the *in vitro* turnover of LK<sub>16</sub>-AccD relative to full length AccD (Supplementary  
296 Figure 3). Similar to SufD, full length AccD appears to contain a weak ClpA-recognition motif as it  
297 is slowly degraded ( $t_{1/2} > 4$  h) by ClpAP in the absence of ClpS (Supplementary Figure 3A, open  
298 squares). Interestingly, this recognition motif appears to be located within this first 15 residues of  
299 AccD, as removal of these residues prevents its turnover by ClpAP (Supplementary Figure 3A, open  
300 circles). In contrast, attachment of an N<sub>d1</sub> residue to processed AccD (LK<sub>16</sub>AccD) generates a classic  
301 Leu/N-degron substrate, which is specifically and rapidly ( $t_{1/2} \sim 8$  min) degraded by ClpAP in the  
302 presence of ClpS (Supplementary Figure 3A, filled circles). Given the N-terminal region of AccD  
303 (residues 23-50) contains a stable C4-type Zn-finger domain, we were interested to understand how  
304 processed AccD is delivered to ClpAP. To do so, we examined the sequence and structure of the  
305 AccD C4-type Zn-finger domain. From this analysis we identified a hydrophobic patch on the  
306 surface of AccD, composed of two discontinuous hydrophobic sequences (Supplementary Figure  
307 3C). To examine the potential involvement of these sequence elements in substrate delivery to  
308 ClpA(P), we generated a series of GFP-fusion proteins which contained N-terminal segments (of  
309 different lengths) derived from LK<sub>16</sub>AccD (see Supplementary Figure 3B). The shortest segment  
310 contained only 5 residues (and lacked the first hydrophobic element). The next construct contained 4  
311 additional residues (9 in total and included the first hydrophobic sequence, VW). Finally, the longest  
312 construct included the entire C4-type Zn-finger domain (and both hydrophobic sequences) while the  
313 last construct was intermediate in size but still included both hydrophobic elements. Interestingly,  
314 although the shortest construct lacked both hydrophobic elements, some turnover by ClpAPS was  
315 still observed (Supplementary Figure 3C, open blue circles), suggesting that a hydrophobic element  
316 is not essential for delivery of all N-degron substrates to ClpA(P). An alternate explanation for this  
317 result, may be that a dihydrophobic element (LF) near the N-terminus of GFP can act as surrogate for  
318 delivery to ClpAP. Nevertheless, the rate of turnover was dramatically enhanced when the first  
319 hydrophobic element (VW) was included in the sequence (Supplementary Figure 3C, open red  
320 circles), and the delivery was further improved when both hydrophobic elements were included in the  
321 GFP-fusion protein. Collectively, these data suggest that a linker sequence with at least nine residues  
322 downstream of the N<sub>d1</sub> residue is required for efficient delivery to ClpA. Importantly, these data are  
323 consistent with previous findings from several groups, showing that the length of the linker region

## N-terminal Thr is a novel secondary destabilizing residue

324 plays a critical role in substrate handoff to ClpAP (Erbse et al., 2006; Wang et al., 2008a; Ninnis et al.,  
325 2009).

326 In summary, consistent with the current dogma for the generation of Leu/N-degron substrates in  
327 bacteria, both AccD and SufD are generated from a pro-N-degron, via an unknown endopeptidase,  
328 which reveals a classic N-terminal secondary destabilizing ( $N_{d2}$ ) residue – Lys – (i.e.  $K_{16}$  in AccD  
329 and  $K_{24}$  in SufD), to which a primary destabilizing ( $N_{d1}$ ) residue (L or F) is then attached by LFTR to  
330 generate an N-degron ligand (i.e.  $LK_{16}$ -AccD or  $LK_{24}$ -SufD). In contrast to AccD and SufD, the N-  
331 degron of AldB is generated by an exopeptidase to remove a single residue, the initiating Met, which  
332 exposes Thr2 at the new N-terminus. This activity is consistent with processing by MetAP, at what  
333 has been termed a “twilight” residue (Frottin et al., 2006; Bienvenut et al., 2015; Yang et al., 2019).  
334 Hence, it appears that MetAP processing of AldB generates a non-canonical substrate ( $T_2$ -AldB) for  
335 attachment of a primary destabilizing residue (L) to produce an N-degron ligand ( $LT_2$ -AldB).  
336 Unexpectedly, the conjugation (of Leu or Phe to  $T_2$ -AldB) was dependent on the activity of LFTR *in*  
337 *vivo*. Therefore, in order to confirm the potential of this conjugation with respect to N-degron  
338 degradation, we first generated a series of recombinant proteins (using the Ub-fusion system, to  
339 ensure the identity of the N-terminal residue) and monitored the ClpAP-dependent turnover of these  
340 proteins in the absence or presence of ClpS (**Figure 2**). Consistent with our identification of  $LT_2$ -  
341 AldB as both a ClpS-ligand and ClpS-dependent substrate of ClpAP *ex vivo*, recombinant  $LT_2$ -AldB  
342 was only degraded by ClpAP in the presence of ClpS (**Figure 2A**, lower panel lanes 8 – 14). In  
343 contrast, both unprocessed AldB ( $MT_2$ -AldB) and MetAP-processed AldB ( $T_2$ -AldB) were stable  
344 both in the presence and absence of ClpS (**Figure 2A**, upper and middle panels, respectively).  
345 Interestingly, similar to AccD and SufD, a compelling hydrophobic element was also absent from the  
346 N-terminal region of AldB, therefore to examine if a hydrophobic element was essential for substrate  
347 delivery to ClpA, we fused the first 11 residues of X-AldB (where X refers to either MT, T or LT) to  
348 GFP (**Figure 2B**). Consistent with the turnover of authentic  $LT_2$ -AldB,  $LT_2$ AldB<sub>3-11</sub>GFP was the  
349 only GFP-fusion protein to be degraded by ClpAPS (**Figure 2B**, black open circles). Collectively  
350 these data confirm  $LT_2$ -AldB as an N-degron substrate and demonstrate that delivery of this N-  
351 degron substrate to ClpA(P) can occur in the absence of a “strong” hydrophobic element within the  
352 linker region.

353 Having confirmed that  $LT_2$ -AldB is a potential N-degron substrate, we examined the ability of Thr to  
354 act as a secondary destabilizing residue for LFTR. Initially as a control, we tested the activity of  
355 LFTR using two artificial model substrates (GFP and PATase) bearing a classic secondary

## N-terminal Thr is a novel secondary destabilizing residue

356 destabilizing residue (R) at the N-terminus (i.e. R- $\beta$ gal<sub>2-11</sub>-GFP and R-PATase). As expected, [<sup>14</sup>C]-  
357 Leu was attached to R- $\beta$ gal<sub>2-11</sub>-GFP (Supplementary Figure 4A, lane 3) and R-PATase  
358 (Supplementary Figure 4B, lane 3). Next, we used PATase as a model protein to examine the ability  
359 of N-terminal Thr to act as an acceptor for LFTR. Consistent with our identification of LT<sub>2</sub>-AldB as a  
360 N-degron ligand recovered from  $\Delta clpA$  cells, T-PATase served as an acceptor for the LFTR-  
361 dependent attachment of radiolabeled Leu (Supplementary Figure 4A, lane 2). We then examined the  
362 ability of LFTR to catalyze the attachment of [<sup>14</sup>C]-Phe to a selection of X-PATase fusion proteins  
363 (Supplementary Figure 4B). Consistent with the conjugation of [<sup>14</sup>C]-Leu, [<sup>14</sup>C]-Phe was also  
364 attached to both T- and R-PATase (albeit to a reduced level than [<sup>14</sup>C]-Leu), but not to FM-PATase  
365 (Supplementary Figure 4B). Finally, we examined the conjugation of [<sup>14</sup>C]-Leu (or [<sup>14</sup>C]-Phe) to  
366 recombinant T<sub>2</sub>-AldB, however despite our efforts we were unable to reconstitute this system *in*  
367 *vitro*. As a result, we speculated that the lack of conjugation to T<sub>2</sub>-AldB may be due to restricted  
368 accessibility of the N-terminus of AldB to LFTR, which could serve as a mechanism to regulate its  
369 conjugation *in vivo*. To overcome this potential constraint, we tested the ability of an Nt Thr (in the  
370 context of the native AldB sequence) to act as substrate for LFTR, using the X-AldB<sub>3-11</sub>GFP fusion  
371 protein. Importantly, both radiolabeled amino acids ([<sup>14</sup>C]-Leu and [<sup>14</sup>C]-Phe) were conjugated to T-  
372 AldB<sub>3-11</sub>GFP (**Figure 2C**, lanes 4 and 9), while in contrast neither LT-AldB<sub>3-11</sub>GFP (**Figure 2C**,  
373 lanes 2 and 7) nor MT-AldB<sub>3-11</sub>GFP (**Figure 2C**, lanes 3 and 8) served as an acceptor for the  
374 conjugation of either amino acid. Collectively, these data confirm that an N-terminal Thr residue can  
375 serve as an acceptor for LFTR and suggests that the acceptor specificity of LFTR is broader than  
376 originally proposed (Shrader et al., 1993). Interestingly, both non-canonical LFTR substrates (i.e.  
377 PATase and AldB) shared the same downstream residue (N). As such, we speculated that (a) the  
378 identity of the second residue (adjacent to the N<sub>d</sub>) might contribute to LFTR specificity/activity and  
379 (b) more specifically, substrates/proteins bearing a non-canonical Nt-residue might exhibit a  
380 restricted preference for specific residues in position 2.

381 Therefore, in order to gain a more complete understanding of LFTR acceptor specificity, we  
382 examined the LFTR-dependent conjugation of [<sup>14</sup>C]-Leu to several libraries of cellulose bound 11-  
383 mer peptides. Initially, as a control, we examined the conjugation of [<sup>14</sup>C]-Leu to 11-mer peptides  
384 derived from the well-established model peptide substrate, casein fragment 90 – 95 (which includes  
385 an Nt Arg) and compared the conjugation to a series of related peptides in which the Nt residue was  
386 exchanged for each of the remaining 19 amino acids. All peptides, derived from the casein fragment

## N-terminal Thr is a novel secondary destabilizing residue

387 90 – 95 also contained the sequence AGSAG at positions 7–11. Initially we examined the specificity  
388 using a peptide library arranged in functional groups (Supplementary Figure 5A). As expected, the  
389 peptides bearing an Nt basic residue (Arg or Lys) served as an acceptor for LFTR (Supplementary  
390 Figure 5A, spots A-35 and A-36). To ensure the observed conjugation specificity was not due to an  
391 uneven distribution of reaction components over the membrane, we altered the arrangement of  
392 immobilized peptides on the cellulose membrane (Supplementary Figure 5C, spots 44 and 53).  
393 Consistent with Supplementary Figure 5A, the activity of LFTR was unchanged by the peptide  
394 position on the cellulose membrane (Supplementary Figure 5C). Importantly, even following  
395 prolonged exposure of the membrane(s), incorporation of [<sup>14</sup>C]-Leu in “negative” peptides spots was  
396 not observed. This suggests that low levels of conjugation are likely to represent actual LFTR-  
397 mediated conjugation. Next, we examined the specificity of the residue downstream of N<sub>d2</sub>, while  
398 maintaining Arg at the N-terminus of the casein peptide (**Figure 3A** and Supplementary Figure 6) or  
399 a peptide derived from the model protein β-gal (Supplementary Figure 7). Consistent with the idea  
400 that the residue at position 2 of the substrate, modulates LFTR specificity, the conjugation of [<sup>14</sup>C]-  
401 Leu varied depending on the identity of this residue. In fact, based on the relative activity of LFTR,  
402 the residue downstream of N<sub>d2</sub> (at position 2) could be broadly categorized into three groups  
403 (favored, accepted and disfavored residues). While basic residues (Arg and Lys) were the most  
404 favored position 2 residue, polar residues (i.e. Ser, Thr, Gln and Asn), Gly, Pro and His were also the  
405 accepted. In contrast to these residues, small hydrophobic residues (i.e. Ala, Leu, Ile and Met) were  
406 only weakly accepted at position 2 of the substrate, with relative conjugation rates of ~ 50%  
407 (Supplementary Figure 8). In contrast to these accepted residues, the remaining residues (i.e. acidic,  
408 aromatic and Cys) were all disfavored, with acidic residues the most strongly disfavored residue at  
409 position 2. Overall, these changes in the level of conjugation (to two sets of different 11-mer peptides  
410 bearing an Nt Arg) clearly demonstrate that (for substrates bearing a classic N<sub>d2</sub> residue, Arg) the  
411 identity of the downstream residue does contribute to LFTR activity. These data are also consistent  
412 with the idea that the identity of this residue also plays an important role in modulating the specificity  
413 of LFTR in the recognition of substrate proteins bearing a non-canonical N<sub>d2</sub> residue (i.e. Met or  
414 Thr). Indeed, the influence of the residue downstream of on LFTR specificity, for protein substrates  
415 bearing non-canonical N<sub>d2</sub> residues, may be greater than that for canonical N<sub>d2</sub> residues (i.e. Arg and  
416 Lys). Furthermore, although His was a permissive residue at position 2 in the context of an Nt Arg,  
417 we noted a small but specific difference in the conjugation of [<sup>14</sup>C]-Leu to RH-casein in comparison  
418 to RH-β-gal, which was not observed with any other amino acid at position 2. Although we cannot

## N-terminal Thr is a novel secondary destabilizing residue

419 exclude that this small difference may be due to the limited sample size of these single use, peptide  
420 array experiments, there is remarkable consistency across the remaining 19 amino acids. Therefore,  
421 we propose that the residue(s) downstream of position 2 (i.e. position 3 and 4), may also make a  
422 minor contribution to LFTR specificity that may be particularly important for LFTR-substrates  
423 bearing a non-canonical N<sub>d2</sub> residue.

424 Therefore, to further examine the role of His (at position 2) in a substrate bearing a non-canonical  
425 N<sub>d2</sub>, we monitored the *in vitro* conjugation of [<sup>14</sup>C]-Leu to a selection of recombinant PATase mutant  
426 proteins, in which either the N-terminal or the second residue of the protein was altered (**Figure 3B**  
427 **upper panel**). As expected, the conjugation of [<sup>14</sup>C]-Leu was strongest to the positive control  
428 acceptor protein (i.e. RN-PATase), which contains a canonical N<sub>d2</sub> residue followed by an “accepted”  
429 position 2 residue (**Figure 3B lower panel**, lane 7). Similarly, the conjugation of [<sup>14</sup>C]-Leu (or [<sup>14</sup>C]-  
430 Phe) was not observed to the negative control acceptor protein (i.e. FM-PATase), which bears a  
431 bulky hydrophobic residue at both the N-terminus and position 2 (**Figure 3B lower panel**, lane 5 and  
432 Supplementary Figure 9). In contrast, weak conjugation of [<sup>14</sup>C]-Leu (but none of [<sup>14</sup>C]-Phe) was  
433 observed for the acceptor FL-PATase (**Figure 3B lower panel**, lane 4). Although these data are  
434 somewhat surprising, they are consistent with the poly-leucylation (conjugation of multiple Leu  
435 residues) observed for M-PATase, LM-PATase and LLM-PATase both *in vitro* and *in vivo* (Ninnis et  
436 al., 2009; Humbard et al., 2013) which demonstrates that although the acceptor pocket of LFTR is  
437 able to accommodate two small hydrophobic residues, it is unable to accommodate two large  
438 hydrophobic residues. Most importantly, and consistent with a moderating role for position 2 of the  
439 acceptor, the conjugation of [<sup>14</sup>C]-Leu to PATase, was completely inhibited by its replacement with  
440 His (i.e. MH<sub>2</sub>-PATase) (**Figure 3B lower panel**, compare lanes 2 and 8). A similar profile was also  
441 observed for the conjugation of [<sup>14</sup>C]-Phe to the same protein substrates, albeit with a reduced  
442 activity (Supplementary Figure 9). Collectively, these data confirm that LFTR-substrates bearing a  
443 non-canonical N<sub>d2</sub> residues (i.e. M or T, L or F) are influenced by the identity of the downstream  
444 residue, and more specifically that Asn appears to be preferred over His, in the context of a substrate  
445 bearing an Nt Met.

446

447 **DISCUSSION**

## N-terminal Thr is a novel secondary destabilizing residue

448 In this study, we used ClpS-affinity chromatography to isolate Leu/N-degron ligands from  $\Delta clpA$  and  
449  $\Delta aat$  *E. coli* cells in stationary phase. Comparison of the dipeptide eluted proteins recovered from  
450  $\Delta clpA$  cells and not from  $\Delta aat$  cells identified eight ligands that are dependent on LFTR activity for  
451 their interaction with ClpS (**Figure 1**). Of these eight LFTR-dependent Leu/N-degron ligands, four  
452 (AldB, AccD, SufD and PATase) are degraded by ClpAPS *ex vivo*, three of which (AldB, AccD and  
453 PATase) we confirmed by N-terminal sequencing to contain a non-ribosomal N<sub>d1</sub> residue (i.e. Leu).  
454 In addition to the above proteins, ClpB and EngS were also identified as potential LFTR-dependent  
455 substrates, however as we were unable to determine the N-terminal sequence of these protein or  
456 monitor their turnover *ex vivo*, these proteins remain unverified Leu/N-degron ligands. In contrast to  
457 the above proteins, AccA and SufC are identified as passenger ligands that co-purified with genuine  
458 Leu/N-degron ligands (AccD and SufD, respectively). Of the confirmed Leu/N-degron ligands,  
459 PATase was previously identified as a LFTR-dependent substrate in which the initiating Met was  
460 shown to serve as an N<sub>d2</sub> residue (Ninnis et al., 2009; Schmidt et al., 2009; Humbard et al., 2013). The  
461 three remaining ligands are processed prior to their conjugation by LFTR. For AccD and SufD the  
462 processing involves removal of a short N-terminal segment, via an unidentified endopeptidase. While  
463 in the case of AldB, removal of the initiating Met by the exopeptidase MetAP is sufficient to generate  
464 an LFTR substrate. Unexpectedly, N-terminal sequencing of AldB (eluted from the ClpS affinity  
465 column) revealed that the primary destabilizing residue (Leu) is post-translationally attached to Thr2  
466 of AldB. Hence, these data demonstrate that AldB is a novel LFTR-dependent Leu/N-degron ligand,  
467 and show that, like the eukaryotic N-degron pathways, MetAP plays a direct role in the bacterial  
468 Leu/N-degron pathway (Varshavsky, 2011; Nguyen et al., 2019; Varshavsky, 2019). Importantly,  
469 although the LFTR-dependent modification of recombinant T<sub>2</sub>-AldB was not confirmed, the  
470 leucylation of two model proteins (bearing an Nt Thr): i.e. T-PATase and a T<sub>2</sub>-AldB<sub>3-11</sub>GFP (**Figure**  
471 **2**), was observed *in vitro*. One explanation for this apparent incongruity is that the N-terminus of  
472 recombinant T<sub>2</sub>-AldB is inaccessible to LFTR *in vitro* and the modification of T<sub>2</sub>-AldB *in vivo* is  
473 conditional upon exposure of its N-terminus. Importantly, consistent with the identification of LT<sub>2</sub>-  
474 AldB as an LFTR-dependent Leu/N-degron ligand, LT<sub>2</sub>-AldB is rapidly degraded by ClpAPS *in vitro*  
475 (**Figure 2**) although we have yet to establish the condition for AldB turnover *in vivo*. Taken together,  
476 our data suggest that T<sub>2</sub>-AldB is a conditional LFTR-dependent substrate, the modification of which  
477 is dependent on exposure of the N-terminus and the identity of the residue in position 2. This  
478 conditional recognition is somewhat reminiscent of the Ac/N-degron pathway in mammals, in which  
479 Ac/N-degrons only become exposed (and hence degraded) for instance, in the absence of a partner  
480 protein (Hwang et al., 2010; Shemorry et al., 2013; Nguyen et al., 2018). Based on our findings, we



## N-terminal Thr is a novel secondary destabilizing residue

481 propose a model for the conditional modification and degradation of *E. coli* AldB (Supplementary  
482 Figure 10). In this model, Nt Met excision (by MetAP) is a crucial step in preparing T<sub>2</sub>-AldB for its  
483 conditional modification by LFTR. This modification of T<sub>2</sub>-AldB generates a Leu/N-degron ligand  
484 (LT<sub>2</sub>-AldB) which is recognized by ClpS and degraded by ClpAP *in vitro*. Therefore our findings  
485 suggest, that in addition to the basic residues (Arg and Lys) (Tobias et al., 1991) and the initiating  
486 Met of PATase (Ninnis et al., 2009), Nt Thr (of AldB) can also act as a N<sub>d2</sub> residue for conjugation  
487 by LFTR (during stationary phase).

488 What is the function of *E. coli* AldB and why is T<sub>2</sub>-AldB modified by LFTR? AldB belongs to a  
489 group of enzymes (Aldehyde dehydrogenases), that catalyze the oxidation of aldehydes to carboxylic  
490 acids. Currently, the function of AldB in *E. coli* is unclear, however its expression has been linked to  
491 persister cell formation (Kawai et al., 2018) and a short-term adaptation response to glucose limiting  
492 conditions (Franchini and Egli, 2006). The expression of AldB is also upregulated in response to  
493 ethanol stress and upon entry into stationary phase and as such has been proposed to detoxify  
494 alcohols and aldehydes that accumulate during stationary phase (Xu and Johnson, 1995;Ho and  
495 Weiner, 2005). Interestingly, YiaY (encoded by the gene upstream of *aldB*) is a putative alcohol  
496 dehydrogenase, which together with AldB, contributes to sequential enzymatic steps in the oxidation  
497 of ethanol to acetate, via acetaldehyde. Therefore, one possibility is that following recovery from  
498 ethanol stress or on exit from stationary phase the cellular levels of AldB (and YiaY) are controlled  
499 by the Leu/N-degron pathway. Intriguingly, YiaY is also known to exhibit Threonine dehydrogenase  
500 (TDH) activity (Ma et al., 2014), and TDH activity in *E. coli* was previously proposed to be regulated  
501 by LFTR (Newman et al., 1976), Despite this, a definitive link between the metabolic stability of  
502 AldB (via its modification by LFTR) and YiaY or a specific cellular stress has yet to be elucidated.

503 Given the identification of T<sub>2</sub>-AldB as a substrate of LFTR, we considered the possibility that (under  
504 different conditions), MetAP cleavage of other proteins with the Nt sequence MTN, may generate  
505 additional LFTR substrates. Therefore, we searched the *E. coli* genome for sequences encoding  
506 proteins with the Nt sequence, MTN. From this analysis we identified 20 proteins (9 of unknown  
507 function), in which the Nt sequence (MTN) is located within the cytosol (i.e. cytosolic proteins,  
508 single or multi-pass inner membrane proteins). Of these 20 proteins, 12 lacked acidic residue near the  
509 N-terminus and hence were selected as potential LFTR-substrates (Supplementary Table 5).  
510 Interestingly, six of the proteins are known to be cleaved (at least partially) by MetAP and one  
511 protein (BarA) is a known ClpA-interacting protein (Butland et al., 2005;Rajagopala et al.,

## N-terminal Thr is a novel secondary destabilizing residue

512 2014;Bienvenut et al., 2015) and hence may represent an additional Leu/N-degron substrate in *E.*  
513 *coli*. However, there is currently no direct evidence that any of these proteins are modified by LFTR.  
514 Therefore, more work is required to see if the metabolic stability of these proteins (including BarA)  
515 is influenced either by ClpS or LFTR.

516 To further examine the acceptor specificity of LFTR we used peptide arrays. This analysis  
517 demonstrated that residue(s) downstream of the N<sub>d2</sub> can influence the specificity of LFTR. Based on  
518 our conjugation data, we propose a relative classification (favored, accepted and disfavored) for  
519 residues in position 2 of the acceptor. Although the vast majority of residues (e.g. small polar and  
520 small hydrophobic residues) are accepted in position 2 of the substrate (> 50% conjugation, relative  
521 to R-b, where b = R or K), only basic residues (i.e. Arg and Lys) are strongly favored in this position.  
522 In contrast, acidic residues are strongly disfavored in position 2 of the acceptor (< 20 % conjugation,  
523 relative to R-b.), while aromatic residues and Cys are also disfavored (< 30% conjugation, relative to  
524 R-b). Significantly, these direct conjugation data are not only generally consistent with the  
525 physicochemical properties of the LFTR binding pocket (Suto et al., 2006;Watanabe et al., 2007), but  
526 they are also highly consistent with the findings of Soffer, who examined the ability of select b-X  
527 dipeptides (where b = Arg or Lys and X = selected amino acids) to inhibit the LFTR-dependent  
528 conjugation of [<sup>14</sup>C]-Phe to α<sub>S1</sub>-casein (Soffer, 1973). Fittingly, the acceptor specificity of LFTR is  
529 comparable to the substrate specificity of the two other main components of the bacterial Leu/N-  
530 degron pathway, MetAP (Frottin et al., 2006) and the N-recognin, ClpS (Erbse et al., 2006;Wang et  
531 al., 2008b;Schuenemann et al., 2009), both of which disfavor acidic residues near the N-terminus of  
532 their substrates.

533

## 534 FIGURE LEGENDS

### 535 **Figure 1. Identification of putative LFTR-dependent N-degron substrates from *E. coli*.**

536 (A) The *ex vivo* turnover of selected *E. coli* N-degrons; AldB, AccD and PATase (as a positive  
537 control) was monitored using specific antisera, in the presence of ClpAPS (lanes 1 – 5) or  
538 ClpAPS<sub>DD/AA</sub> (lanes 6 – 10). (B) The *ex vivo* turnover of putative *E. coli* N-degrons (SufC and SufD)  
539 was monitored using specific antisera, in the presence of ClpAPS (lanes 1 – 5) or ClpAPS<sub>DD/AA</sub>  
540 (lanes 6 – 10). (C) *E. coli* proteins from either a Δ*clpA* (lane 2) or Δ*aat* (lane 3) *E. coli* cell lysate,  
541 were applied to Ni-NTA agarose beads containing immobilized wild type (lanes 4 and 6) or mutant  
542 (lane 5) ClpS. N-degron proteins were specifically eluted from wild type ClpS (lanes 4 and 6) and not

## N-terminal Thr is a novel secondary destabilizing residue

543 from the immobilized mutant, ClpS<sub>DD/AA</sub> (lane 5). LFTR-dependent N-degrons (AldB, AccD and  
544 SufD) were only recovered in the FR-eluted fraction from  $\Delta clpA$  cells (lane 4) and not in the FR-  
545 eluted fraction from  $\Delta aat$  cells (lane 6). Proteins were separated by Tricine SDS-PAGE.

### 546 **Figure 2. The LFTR-dependent leucylation of T<sub>2</sub>-AldB generates a ClpS-dependent substrate** 547 **for ClpAP, *in vitro*.**

548 **(A)** The *in vitro* turnover of AldB is dependent on the presence of an N<sub>d1</sub> (Leu). The ClpAP-mediated  
549 turnover of recombinant X-AldB was monitored *in vitro*, in the absence (lanes 1 – 7) or presence  
550 (lanes 8 – 14) of ClpS. Only LT<sub>2</sub>-AldB (lower panel) was degraded by ClpAPS, neither MT<sub>2</sub>-AldB  
551 (upper panel) nor T<sub>2</sub>-AldB (middle panel) were degraded by ClpAP or ClpAPS. **(B)** Schematic  
552 representation of the GFP fusions (upper panel). The turnover of MT<sub>2</sub>-AldB<sub>3-11</sub>GFP (red squares), T<sub>2</sub>-  
553 AldB<sub>3-11</sub>GFP (blue diamonds) and LT<sub>2</sub>-AldB<sub>3-11</sub>GFP (black circles) was monitored in the absence  
554 (filled symbols) or presence (open symbols) of ClpS. Protein turnover was monitored by the loss of  
555 GFP fluorescence ( $\lambda_{ex} = 400$  nm and  $\lambda_{em} = 510$  nm). **(C)** The LFTR-dependent modification of T-  
556 PATase (lanes 1 and 6), LT<sub>2</sub>-AldB<sub>3-11</sub>GFP (lanes 2 and 7), MT<sub>2</sub>-AldB<sub>3-11</sub>GFP (lanes 3 and 8) and T<sub>2</sub>-  
557 AldB<sub>3-11</sub>GFP (lanes 4 and 9) was monitored in the presence of either [<sup>14</sup>C]-Leu (lanes 1 – 4) or [<sup>14</sup>C]-  
558 Phe (lanes 6 – 9). See blue MW markers are indicated.

### 559 **Figure 3. The specificity of LFTR is influenced by the identity of the residue in position 2.**

560 **(A, upper panel)** [<sup>14</sup>C]-Leu phosphorimages of two 11-mer peptide libraries with LFTR highlighting  
561 R-X-casein peptide spots (for the full phosphorimage of each library, see Supplementary Figure 6).  
562 Peptide sequences for R-X-casein peptides are indicated below each peptide library panel. For details  
563 of all other peptide sequences see Supplementary Tables 2 and 3. **(A, lower panel)** Conjugation of  
564 [<sup>14</sup>C]-Leu to R-X-casein, relative to the average conjugation of R-b-casein, where b = R, K. Relative  
565 conjugation activity was determined from two independent experiments and is separated into three  
566 broad categories (favored (>75%), accepted (40 – 75%, grey panel) and disfavored (< 40%)). **(B)**  
567 The Nt leucylation of XX-PATase *in vitro* is dependent on the identity of the first two residues. Nt  
568 sequences of XX-PATase mutants used in the assays (upper panel). Recombinant XX-PATase was  
569 separated by 12.5% SDS-PAGE and stained with Coomassie Brilliant Blue (CBB, lower panel).  
570 Following drying of the stained, polyacrylamide gel, the [<sup>14</sup>C]-Leu radiolabeled proteins were  
571 detected by phosphor image analysis using a Typhoon Trio Variable Mode Imager (panel). As a  
572 control MN-PATase was incubated in the presence (lane 2) or absence (lane 3) of LFTR. All other

## N-terminal Thr is a novel secondary destabilizing residue

573 XX-PATase variants were incubated in the presence of LFTR. FL-PATase (lane 4), FM-PATase  
574 (lane 5) TN-PATase (lane 6) RN-PATase (lane 7) and MH-PATase (lane 9). See blue + MW markers  
575 (lane 1).

### 576 AUTHOR CONTRIBUTIONS

577 Conceptualization, D.A.D. and K.N.T.; methodology, K.N.T. and D.A.D.; investigation, R.D.O and  
578 R.L.N.; writing original draft, R.D.O., D.A.D. and K.N.T.; supervision, project administration and  
579 funding acquisition, D.A.D. and K.N.T.

### 580 FUNDING

581 K.N.T. was supported by and Australian Research Council (A.R.C.) Future Fellowship (FT0992033)  
582 and D.A.D. was supported by an A.R.C. Australian Research Fellowship (DP110103936). R.D.O.  
583 and R.L.N. were supported by Australian Postgraduate Awards.

### 584 ACKNOWLEDGEMENTS

585 We thank the Australian Proteome Analysis Facility (APAF) for performing Edman degradation, the  
586 National BioResource Project (NIG, Japan) for the *E. coli* strains used in this study.

### 587 REFERENCES

- 588 Alhuwaider, A.H., and Dougan, D.A. (2017). AAA+ Machines of Protein Destruction in  
589 Mycobacteria. *Front Mol Biosci* 4, 49.
- 590 Bienvenut, W.V., Giglione, C., and Meinel, T. (2015). Proteome-wide analysis of the amino  
591 terminal status of Escherichia coli proteins at the steady-state and upon dephosphorylation  
592 inhibition. *Proteomics* 15, 2503-2518.
- 593 Bouchnak, I., and Van Wijk, K.J. (2019). N-Degron Pathways in Plastids. *Trends Plant Sci* 24, 917-  
594 926.
- 595 Butland, G., Peregrin-Alvarez, J.M., Li, J., Yang, W., Yang, X., Canadien, V., et al. (2005).  
596 Interaction network containing conserved and essential protein complexes in Escherichia coli.  
597 *Nature* 433, 531-537.
- 598 Catanzariti, A.M., Soboleva, T.A., Jans, D.A., Board, P.G., and Baker, R.T. (2004). An efficient  
599 system for high-level expression and easy purification of authentic recombinant proteins.  
600 *Protein Sci* 13, 1331-1339.
- 601 Chen, S.J., Wu, X., Wadas, B., Oh, J.H., and Varshavsky, A. (2017). An N-end rule pathway that  
602 recognizes proline and destroys gluconeogenic enzymes. *Science* 355.
- 603 Dissmeyer, N., Rivas, S., and Graciet, E. (2018). Life and death of proteins after protease cleavage:  
604 protein degradation by the N-end rule pathway. *New Phytol* 218, 929-935.
- 605 Dougan, D.A., Micevski, D., and Truscott, K.N. (2012). The N-end rule pathway: from recognition  
606 by N-recognins, to destruction by AAA+proteases. *Biochim Biophys Acta* 1823, 83-91.
- 607 Dougan, D.A., Mogk, A., Zeth, K., Turgay, K., and Bukau, B. (2002a). AAA+ proteins and substrate  
608 recognition, it all depends on their partner in crime. *FEBS Lett* 529, 6-10.

## N-terminal Thr is a novel secondary destabilizing residue

- 609 Dougan, D.A., Reid, B.G., Horwich, A.L., and Bukau, B. (2002b). ClpS, a substrate modulator of the  
610 ClpAP machine. *Mol Cell* 9, 673-683.
- 611 Dougan, D.A., Truscott, K.N., and Zeth, K. (2010). The bacterial N-end rule pathway: expect the  
612 unexpected. *Mol Microbiol* 76, 545-558.
- 613 Dougan, D.A., and Varshavsky, A. (2018). Understanding the Pro/N-end rule pathway. *Nat Chem*  
614 *Biol* 14, 415-416.
- 615 Erbse, A., Schmidt, R., Bornemann, T., Schneider-Mergener, J., Mogk, A., Zahn, R., et al. (2006).  
616 ClpS is an essential component of the N-end rule pathway in Escherichia coli. *Nature* 439,  
617 753-756.
- 618 Flynn, J.M., Neher, S.B., Kim, Y.I., Sauer, R.T., and Baker, T.A. (2003). Proteomic discovery of  
619 cellular substrates of the ClpXP protease reveals five classes of ClpX-recognition signals.  
620 *Mol Cell* 11, 671-683.
- 621 Franchini, A.G., and Egli, T. (2006). Global gene expression in Escherichia coli K-12 during short-  
622 term and long-term adaptation to glucose-limited continuous culture conditions. *Microbiology*  
623 *(Reading)* 152, 2111-2127.
- 624 Frottin, F., Martinez, A., Peynot, P., Mitra, S., Holz, R.C., Giglione, C., et al. (2006). The proteomics  
625 of N-terminal methionine cleavage. *Mol Cell Proteomics* 5, 2336-2349.
- 626 Gao, X., Yeom, J., and Groisman, E.A. (2019). The expanded specificity and physiological role of a  
627 widespread N-degron recognin. *Proc Natl Acad Sci U S A* 116, 18629-18637.
- 628 Geissler, A., Chacinska, A., Truscott, K.N., Wiedemann, N., Brandner, K., Sickmann, A., et al.  
629 (2002). The mitochondrial presequence translocase: an essential role of Tim50 in directing  
630 preproteins to the import channel. *Cell* 111, 507-518.
- 631 Gibbs, D.J., Bacardit, J., Bachmair, A., and Holdsworth, M.J. (2014). The eukaryotic N-end rule  
632 pathway: conserved mechanisms and diverse functions. *Trends Cell Biol* 24, 603-611.
- 633 Graciet, E., Hu, R.G., Piatkov, K., Rhee, J.H., Schwarz, E.M., and Varshavsky, A. (2006).  
634 Aminoacyl-transferases and the N-end rule pathway of prokaryotic/eukaryotic specificity in a  
635 human pathogen. *Proc Natl Acad Sci U S A* 103, 3078-3083.
- 636 Gur, E., Ottofueling, R., and Dougan, D.A. (2013). Machines of destruction - AAA+ proteases and  
637 the adaptors that control them. *Subcell Biochem* 66, 3-33.
- 638 Ho, K.K., and Weiner, H. (2005). Isolation and characterization of an aldehyde dehydrogenase  
639 encoded by the aldB gene of Escherichia coli. *J Bacteriol* 187, 1067-1073.
- 640 Humbard, M.A., Surkov, S., De Donatis, G.M., Jenkins, L.M., and Maurizi, M.R. (2013). The N-  
641 degradome of Escherichia coli: limited proteolysis in vivo generates a large pool of proteins  
642 bearing N-degrons. *J Biol Chem* 288, 28913-28924.
- 643 Hwang, C.S., Shemorry, A., and Varshavsky, A. (2010). N-terminal acetylation of cellular proteins  
644 creates specific degradation signals. *Science* 327, 973-977.
- 645 Kaji, A., Kaji, H., and Novelli, G.D. (1963). A soluble amino acid incorporating system. *Biochem*  
646 *Biophys Res Commun* 10, 406-409.
- 647 Kawai, Y., Matsumoto, S., Ling, Y., Okuda, S., and Tsuneda, S. (2018). AldB controls persister  
648 formation in Escherichia coli depending on environmental stress. *Microbiol Immunol* 62, 299-  
649 309.
- 650 Keiler, K.C., Waller, P.R., and Sauer, R.T. (1996). Role of a peptide tagging system in degradation of  
651 proteins synthesized from damaged messenger RNA. *Science* 271, 990-993.
- 652 Kim, H.K., Kim, R.R., Oh, J.H., Cho, H., Varshavsky, A., and Hwang, C.S. (2014). The N-terminal  
653 methionine of cellular proteins as a degradation signal. *Cell* 156, 158-169.
- 654 Kirstein, J., Moliere, N., Dougan, D.A., and Turgay, K. (2009). Adapting the machine: adaptor  
655 proteins for Hsp100/Clp and AAA+ proteases. *Nat Rev Microbiol* 7, 589-599.

## N-terminal Thr is a novel secondary destabilizing residue

- 656 Kress, W., Mutschler, H., and Weber-Ban, E. (2009). Both ATPase domains of ClpA are critical for  
657 processing of stable protein structures. *J Biol Chem* 284, 31441-31452.
- 658 Leibowitz, M.J., and Soffer, R.L. (1970). Enzymatic modification of proteins. 3. Purification and  
659 properties of a leucyl, phenylalanyl transfer ribonucleic acid protein transferase from  
660 *Escherichia coli*. *J Biol Chem* 245, 2066-2073.
- 661 Lucas, X., and Ciulli, A. (2017). Recognition of substrate degrons by E3 ubiquitin ligases and  
662 modulation by small-molecule mimicry strategies. *Curr Opin Struct Biol* 44, 101-110.
- 663 Ma, F., Wang, T., Ma, X., and Wang, P. (2014). Identification and characterization of protein  
664 encoded by orf382 as L-threonine dehydrogenase. *J Microbiol Biotechnol* 24, 748-755.
- 665 Mahmoud, S.A., and Chien, P. (2018). Regulated Proteolysis in Bacteria. *Annu Rev Biochem* 87,  
666 677-696.
- 667 Mogk, A., Schmidt, R., and Bukau, B. (2007). The N-end rule pathway for regulated proteolysis:  
668 prokaryotic and eukaryotic strategies. *Trends Cell Biol* 17, 165-172.
- 669 Neuwald, A.F., Aravind, L., Spouge, J.L., and Koonin, E.V. (1999). AAA+: A class of chaperone-  
670 like ATPases associated with the assembly, operation, and disassembly of protein complexes.  
671 *Genome Res* 9, 27-43.
- 672 Newman, E.B., Kapoor, V., and Potter, R. (1976). Role of L-threonine dehydrogenase in the  
673 catabolism of threonine and synthesis of glycine by *Escherichia coli*. *J Bacteriol* 126, 1245-  
674 1249.
- 675 Nguyen, K.T., Kim, J.M., Park, S.E., and Hwang, C.S. (2019). N-terminal methionine excision of  
676 proteins creates tertiary destabilizing N-degrons of the Arg/N-end rule pathway. *J Biol Chem*  
677 294, 4464-4476.
- 678 Nguyen, K.T., Mun, S.H., Lee, C.S., and Hwang, C.S. (2018). Control of protein degradation by N-  
679 terminal acetylation and the N-end rule pathway. *Exp Mol Med* 50, 1-8.
- 680 Ninnis, R.L., Spall, S.K., Talbo, G.H., Truscott, K.N., and Dougan, D.A. (2009). Modification of  
681 PATase by L/F-transferase generates a ClpS-dependent N-end rule substrate in *Escherichia*  
682 *coli*. *EMBO J* 28, 1732-1744.
- 683 Ogura, T., and Wilkinson, A.J. (2001). AAA+ superfamily ATPases: common structure--diverse  
684 function. *Genes Cells* 6, 575-597.
- 685 Piatkov, K.I., Vu, T.T., Hwang, C.S., and Varshavsky, A. (2015). Formyl-methionine as a  
686 degradation signal at the N-termini of bacterial proteins. *Microb Cell* 2, 376-393.
- 687 Rajagopala, S.V., Sikorski, P., Kumar, A., Mosca, R., Vlasblom, J., Arnold, R., et al. (2014). The  
688 binary protein-protein interaction landscape of *Escherichia coli*. *Nat Biotechnol* 32, 285-290.
- 689 Rivera-Rivera, I., Roman-Hernandez, G., Sauer, R.T., and Baker, T.A. (2014). Remodeling of a  
690 delivery complex allows ClpS-mediated degradation of N-degron substrates. *Proc Natl Acad*  
691 *Sci U S A* 111, E3853-3859.
- 692 Roman-Hernandez, G., Hou, J.Y., Grant, R.A., Sauer, R.T., and Baker, T.A. (2011). The ClpS  
693 adaptor mediates staged delivery of N-end rule substrates to the AAA+ ClpAP protease. *Mol*  
694 *Cell* 43, 217-228.
- 695 Sauer, R.T., and Baker, T.A. (2011). AAA+ proteases: ATP-fueled machines of protein destruction.  
696 *Annu Rev Biochem* 80, 587-612.
- 697 Scarpulla, R.C., Deutch, C.E., and Soffer, R.L. (1976). Transfer of methionyl residues by leucyl,  
698 phenylalanyl-tRNA-protein transferase. *Biochem Biophys Res Commun* 71, 584-589.
- 699 Schmidt, R., Zahn, R., Bukau, B., and Mogk, A. (2009). ClpS is the recognition component for  
700 *Escherichia coli* substrates of the N-end rule degradation pathway. *Mol Microbiol* 72, 506-  
701 517.
- 702 Schuenemann, V.J., Kralik, S.M., Albrecht, R., Spall, S.K., Truscott, K.N., Dougan, D.A., et al.  
703 (2009). Structural basis of N-end rule substrate recognition in *Escherichia coli* by the ClpAP  
704 adaptor protein ClpS. *EMBO Rep* 10, 508-514.

## N-terminal Thr is a novel secondary destabilizing residue

- 705 Shemorry, A., Hwang, C.S., and Varshavsky, A. (2013). Control of protein quality and  
706 stoichiometries by N-terminal acetylation and the N-end rule pathway. *Mol Cell* 50, 540-551.
- 707 Shrader, T.E., Tobias, J.W., and Varshavsky, A. (1993). The N-end rule in *Escherichia coli*: cloning  
708 and analysis of the leucyl, phenylalanyl-tRNA-protein transferase gene *aat*. *J Bacteriol* 175,  
709 4364-4374.
- 710 Soffer, R.L. (1973). Peptide acceptors in the arginine transfer reaction. *J Biol Chem* 248, 2918-2921.
- 711 Striebel, F., Kress, W., and Weber-Ban, E. (2009). Controlled destruction: AAA+ ATPases in protein  
712 degradation from bacteria to eukaryotes. *Curr Opin Struct Biol* 19, 209-217.
- 713 Suto, K., Shimizu, Y., Watanabe, K., Ueda, T., Fukai, S., Nureki, O., et al. (2006). Crystal structures  
714 of leucyl/phenylalanyl-tRNA-protein transferase and its complex with an aminoacyl-tRNA  
715 analog. *EMBO J* 25, 5942-5950.
- 716 Tasaki, T., Sriram, S.M., Park, K.S., and Kwon, Y.T. (2012). The N-end rule pathway. *Annu Rev*  
717 *Biochem* 81, 261-289.
- 718 Timms, R.T., and Koren, I. (2020). Tying up loose ends: the N-degron and C-degron pathways of  
719 protein degradation. *Biochem Soc Trans* 48, 1557-1567.
- 720 Tobias, J.W., Shrader, T.E., Rocap, G., and Varshavsky, A. (1991). The N-end rule in bacteria.  
721 *Science* 254, 1374-1377.
- 722 Tu, G.F., Reid, G.E., Zhang, J.G., Moritz, R.L., and Simpson, R.J. (1995). C-terminal extension of  
723 truncated recombinant proteins in *Escherichia coli* with a 10Sa RNA decapeptide. *J Biol*  
724 *Chem* 270, 9322-9326.
- 725 Varshavsky, A. (2011). The N-end rule pathway and regulation by proteolysis. *Protein Sci* 20, 1298-  
726 1345.
- 727 Varshavsky, A. (2019). N-degron and C-degron pathways of protein degradation. *Proc Natl Acad Sci*  
728 *U S A* 116, 358-366.
- 729 Wang, K.H., Oakes, E.S., Sauer, R.T., and Baker, T.A. (2008a). Tuning the strength of a bacterial N-  
730 end rule degradation signal. *J Biol Chem* 283, 24600-24607.
- 731 Wang, K.H., Roman-Hernandez, G., Grant, R.A., Sauer, R.T., and Baker, T.A. (2008b). The  
732 molecular basis of N-end rule recognition. *Mol Cell* 32, 406-414.
- 733 Watanabe, K., Toh, Y., Suto, K., Shimizu, Y., Oka, N., Wada, T., et al. (2007). Protein-based  
734 peptide-bond formation by aminoacyl-tRNA protein transferase. *Nature* 449, 867-871.
- 735 Xu, J., and Johnson, R.C. (1995). *aldB*, an RpoS-dependent gene in *Escherichia coli* encoding an  
736 aldehyde dehydrogenase that is repressed by Fis and activated by Crp. *J Bacteriol* 177, 3166-  
737 3175.
- 738 Yang, C.I., Hsieh, H.H., and Shan, S.O. (2019). Timing and specificity of cotranslational nascent  
739 protein modification in bacteria. *Proc Natl Acad Sci U S A* 116, 23050-23060.
- 740 Yeom, J., and Groisman, E.A. (2019). Activator of one protease transforms into inhibitor of another  
741 in response to nutritional signals. *Genes Dev* 33, 1280-1292.
- 742 Yeom, J., Wayne, K.J., and Groisman, E.A. (2017). Sequestration from Protease Adaptor Confers  
743 Differential Stability to Protease Substrate. *Mol Cell* 66, 234-246 e235.

744

**A**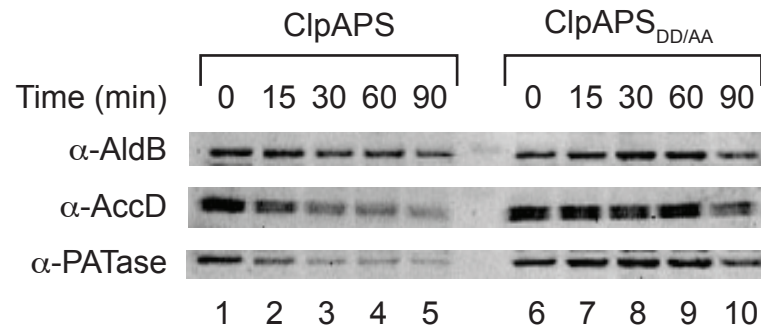**B**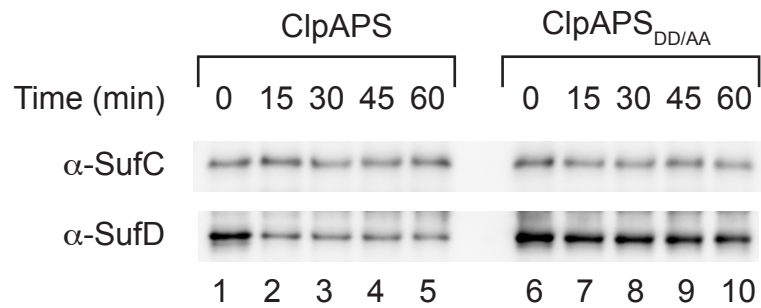**C**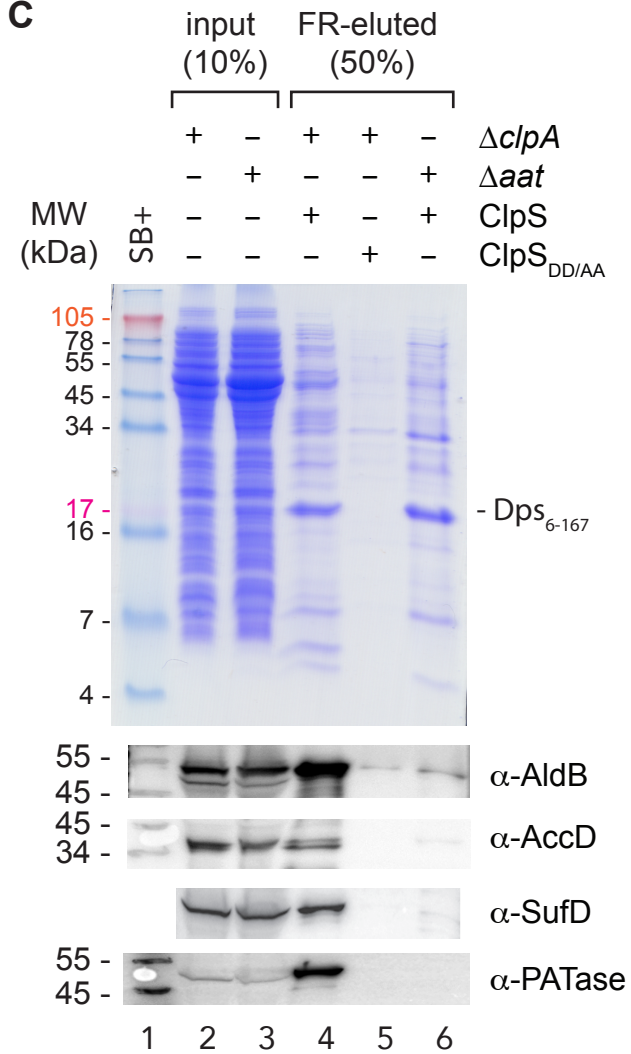**Figure 1**



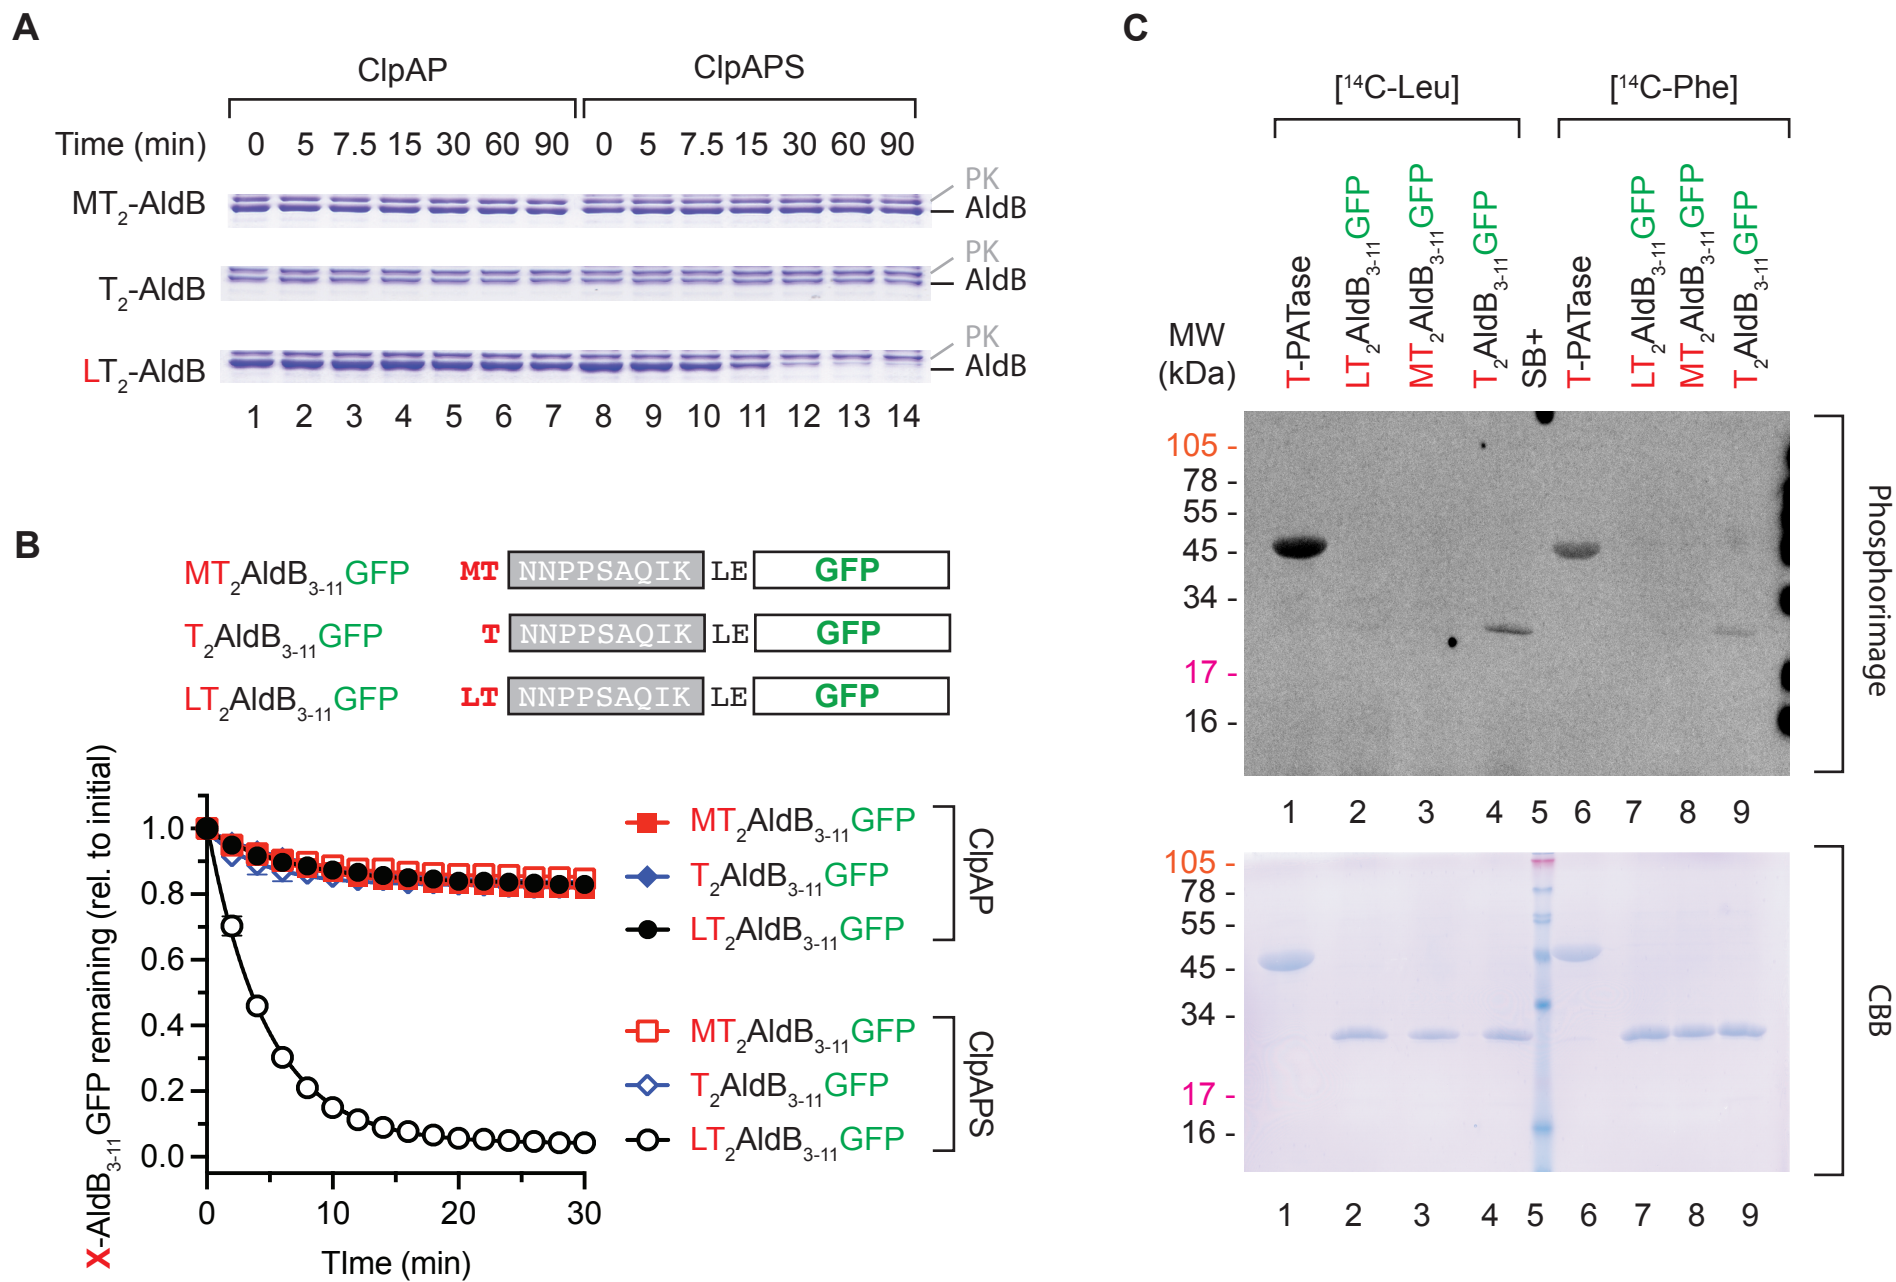

**Figure 2**

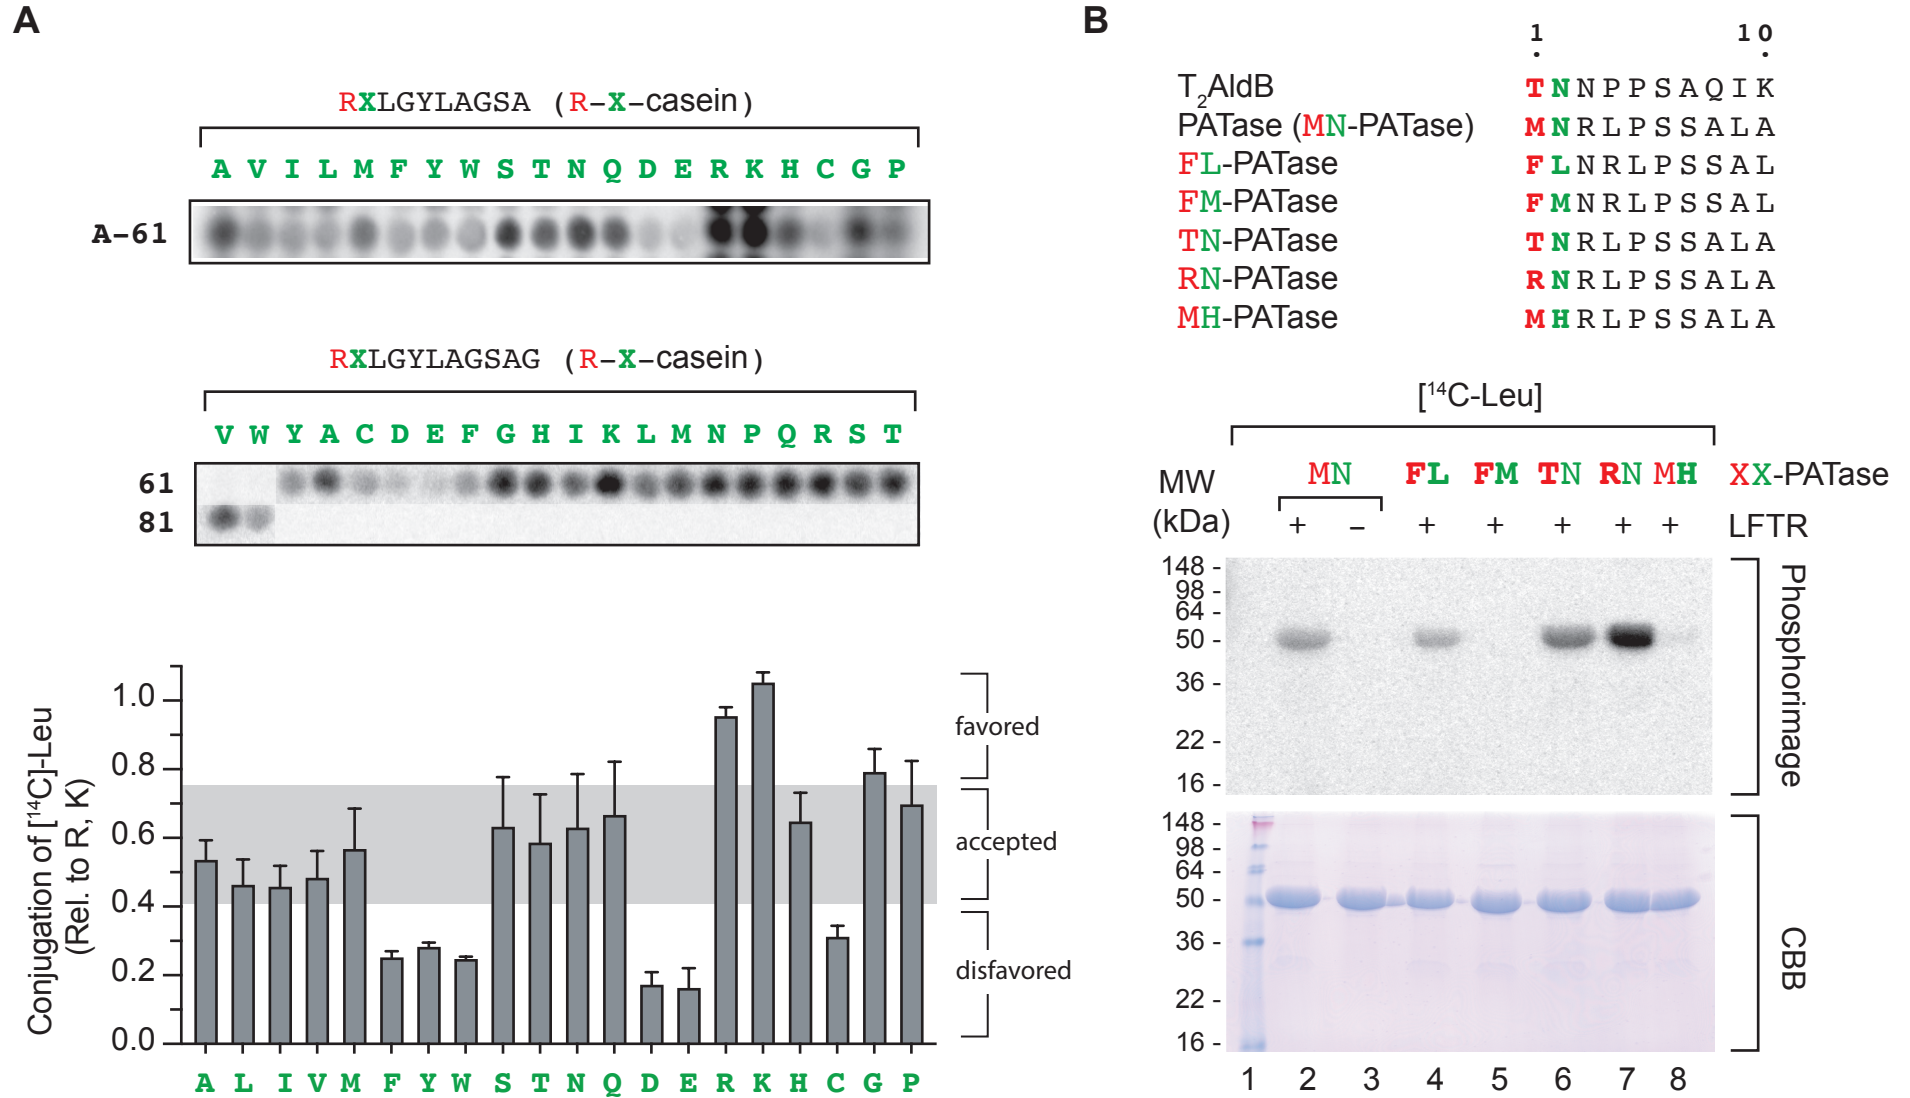

Figure 3
